# Supplementary material
Source: PubMed Central journal article supplement (PMC8892500)
Supplement: mmc3.pdf [file mmc3.pdf]

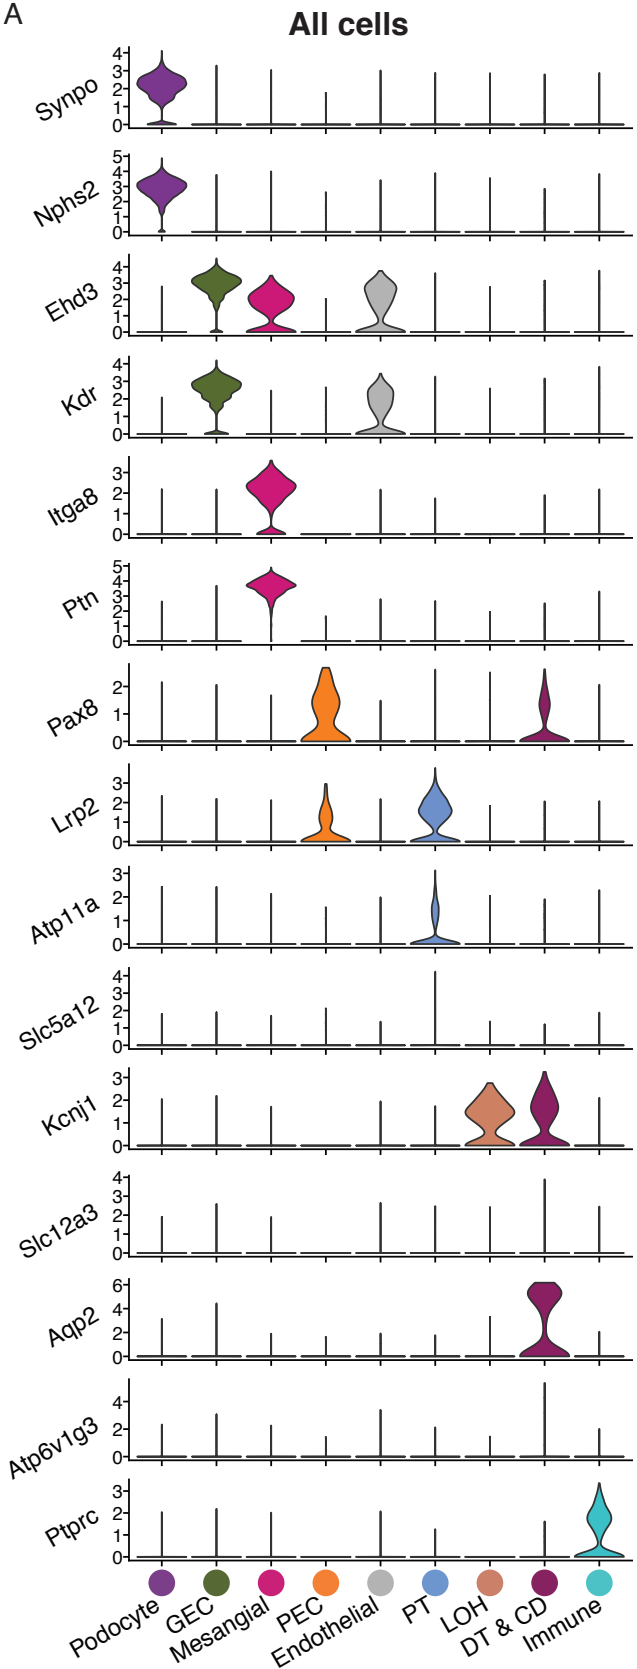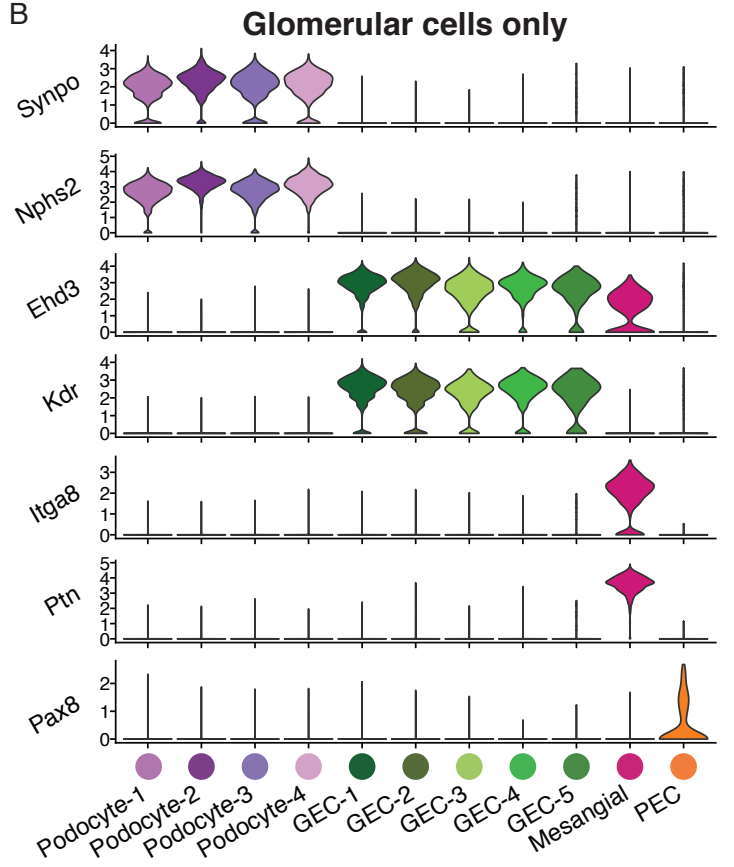

Podocyte GEC Mesangial PEC Endothelial PT LOH DT & CD Immune

Podocyte-1 Podocyte-2 Podocyte-3 Podocyte-4 GEC-1 GEC-2 GEC-3 GEC-4 GEC-5 Mesangial PEC
