# Supplementary material
Source: PubMed Central journal article supplement (PMC8892500)

**A**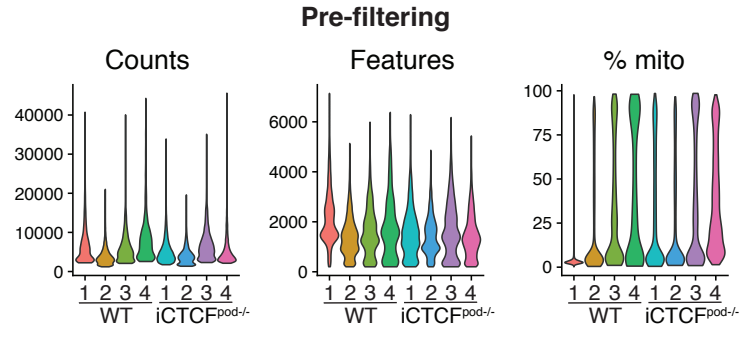**B**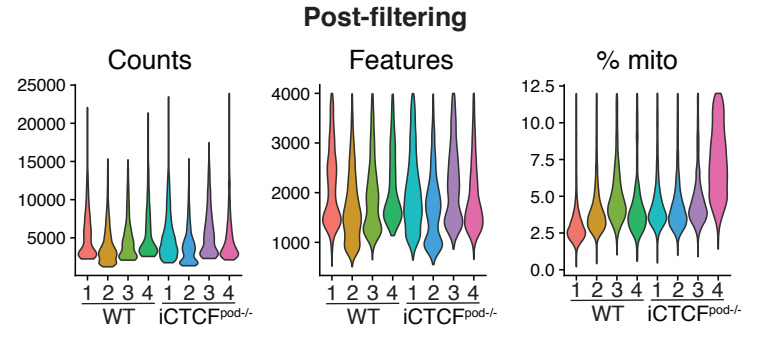

Supplement: mmc1.pdf [file mmc1.pdf]

A

## All cells

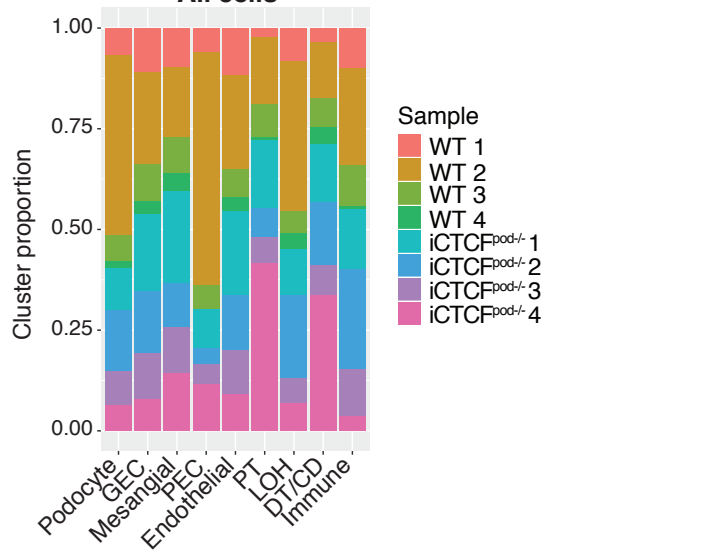

B

## Glomerular cells only

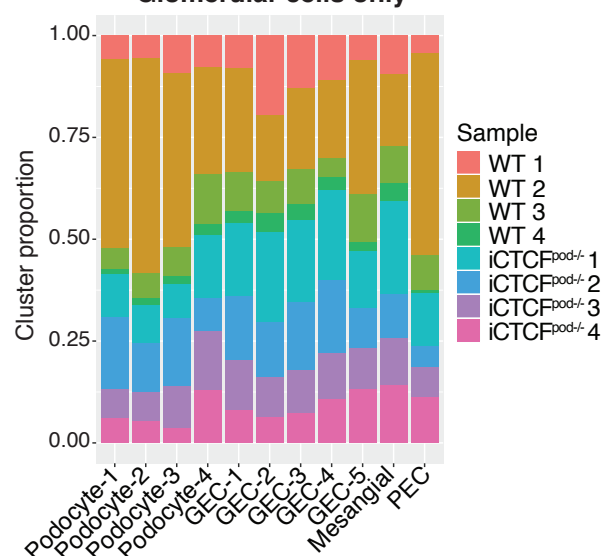

C

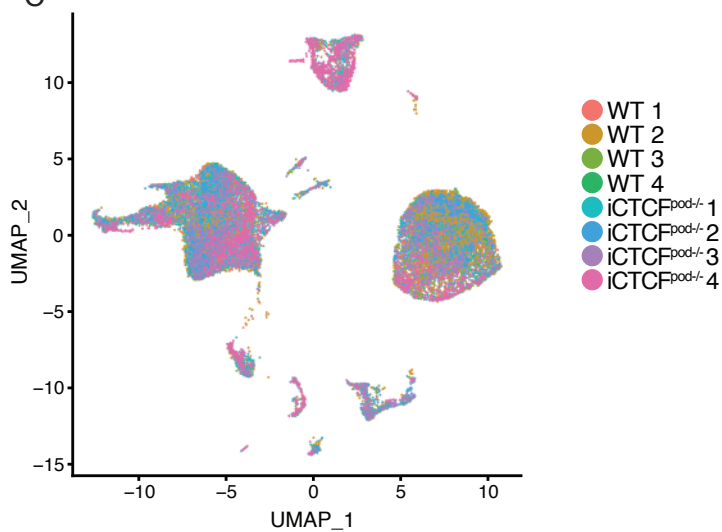

D

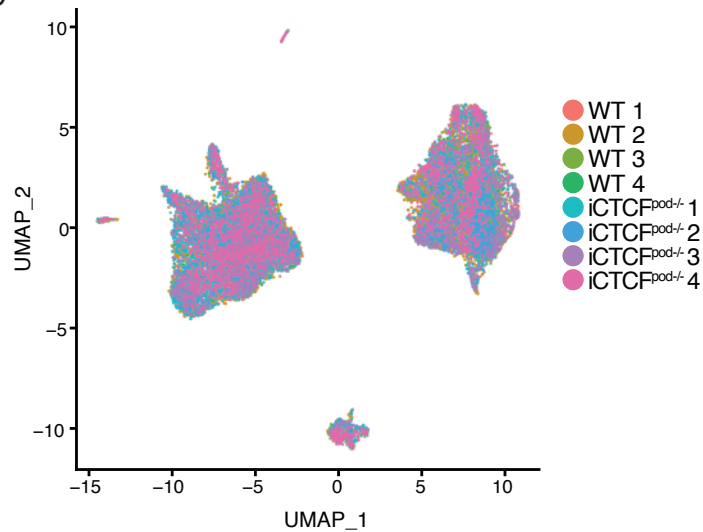

E

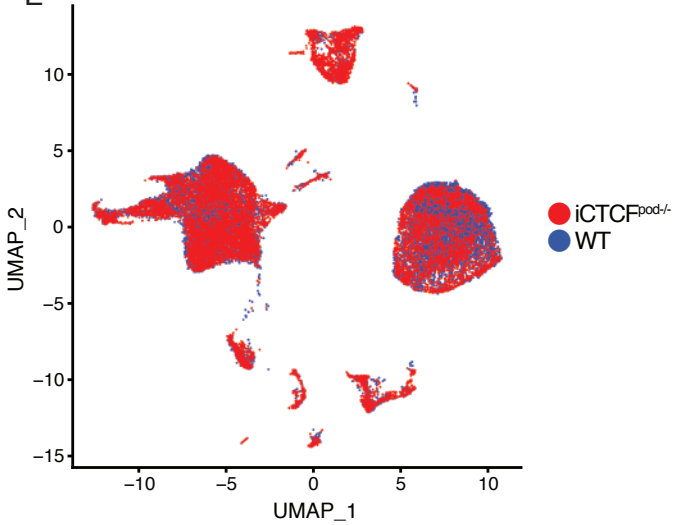

F

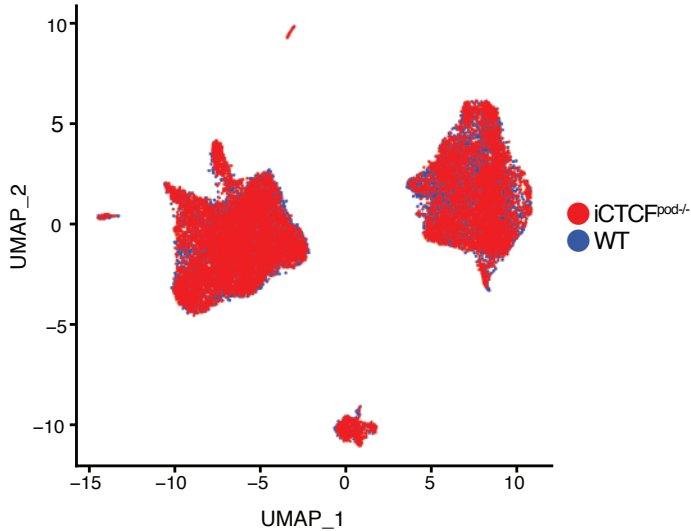

Supplement: mmc2.pdf [file mmc2.pdf]

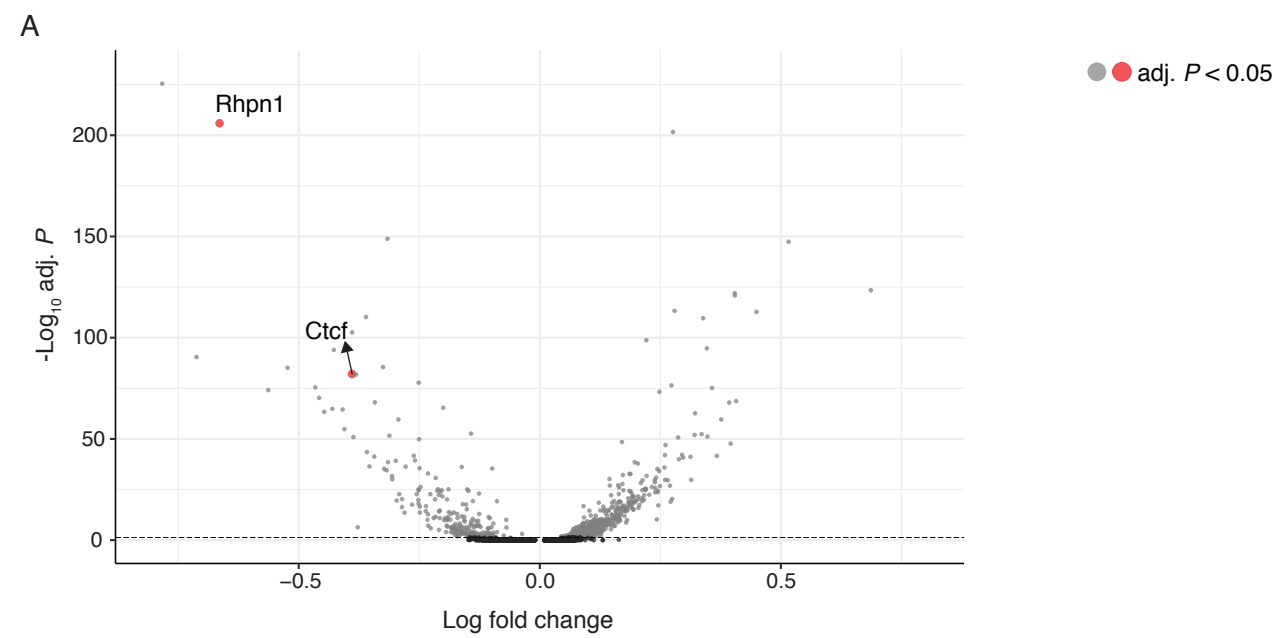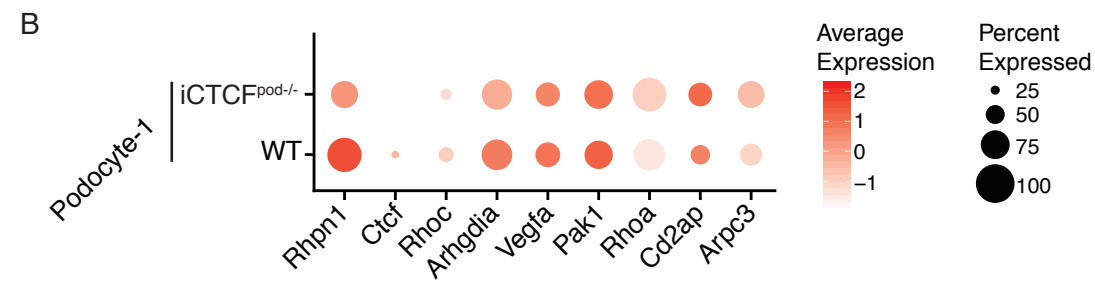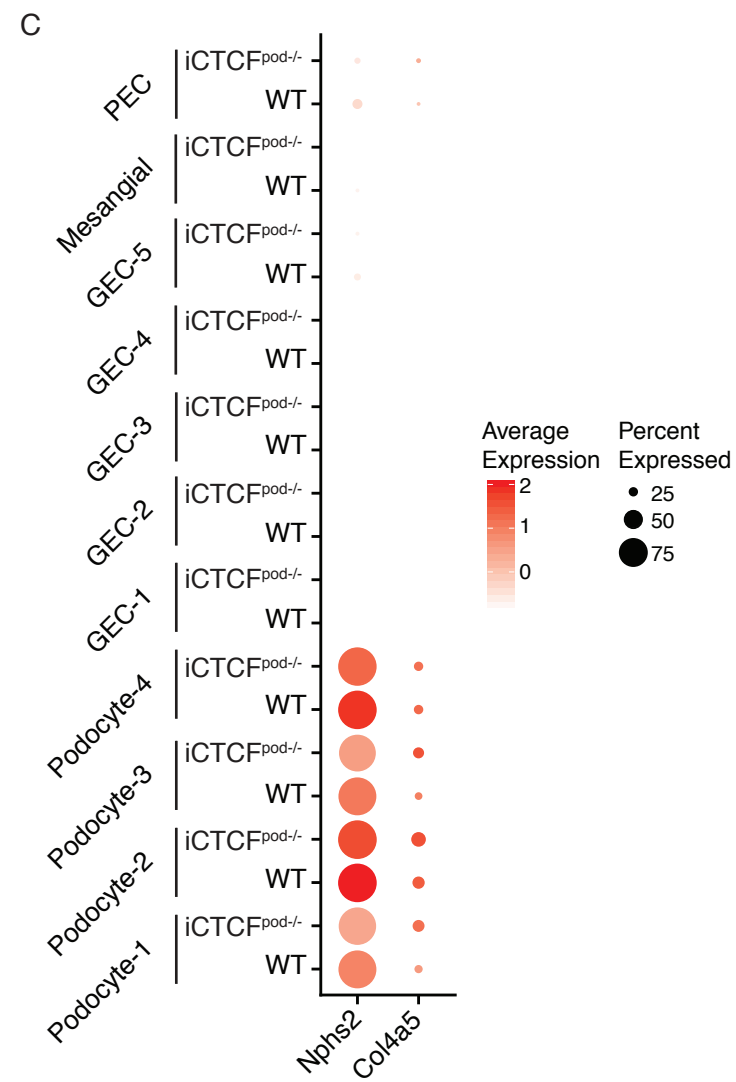

Supplement: mmc4.pdf [file mmc4.pdf]

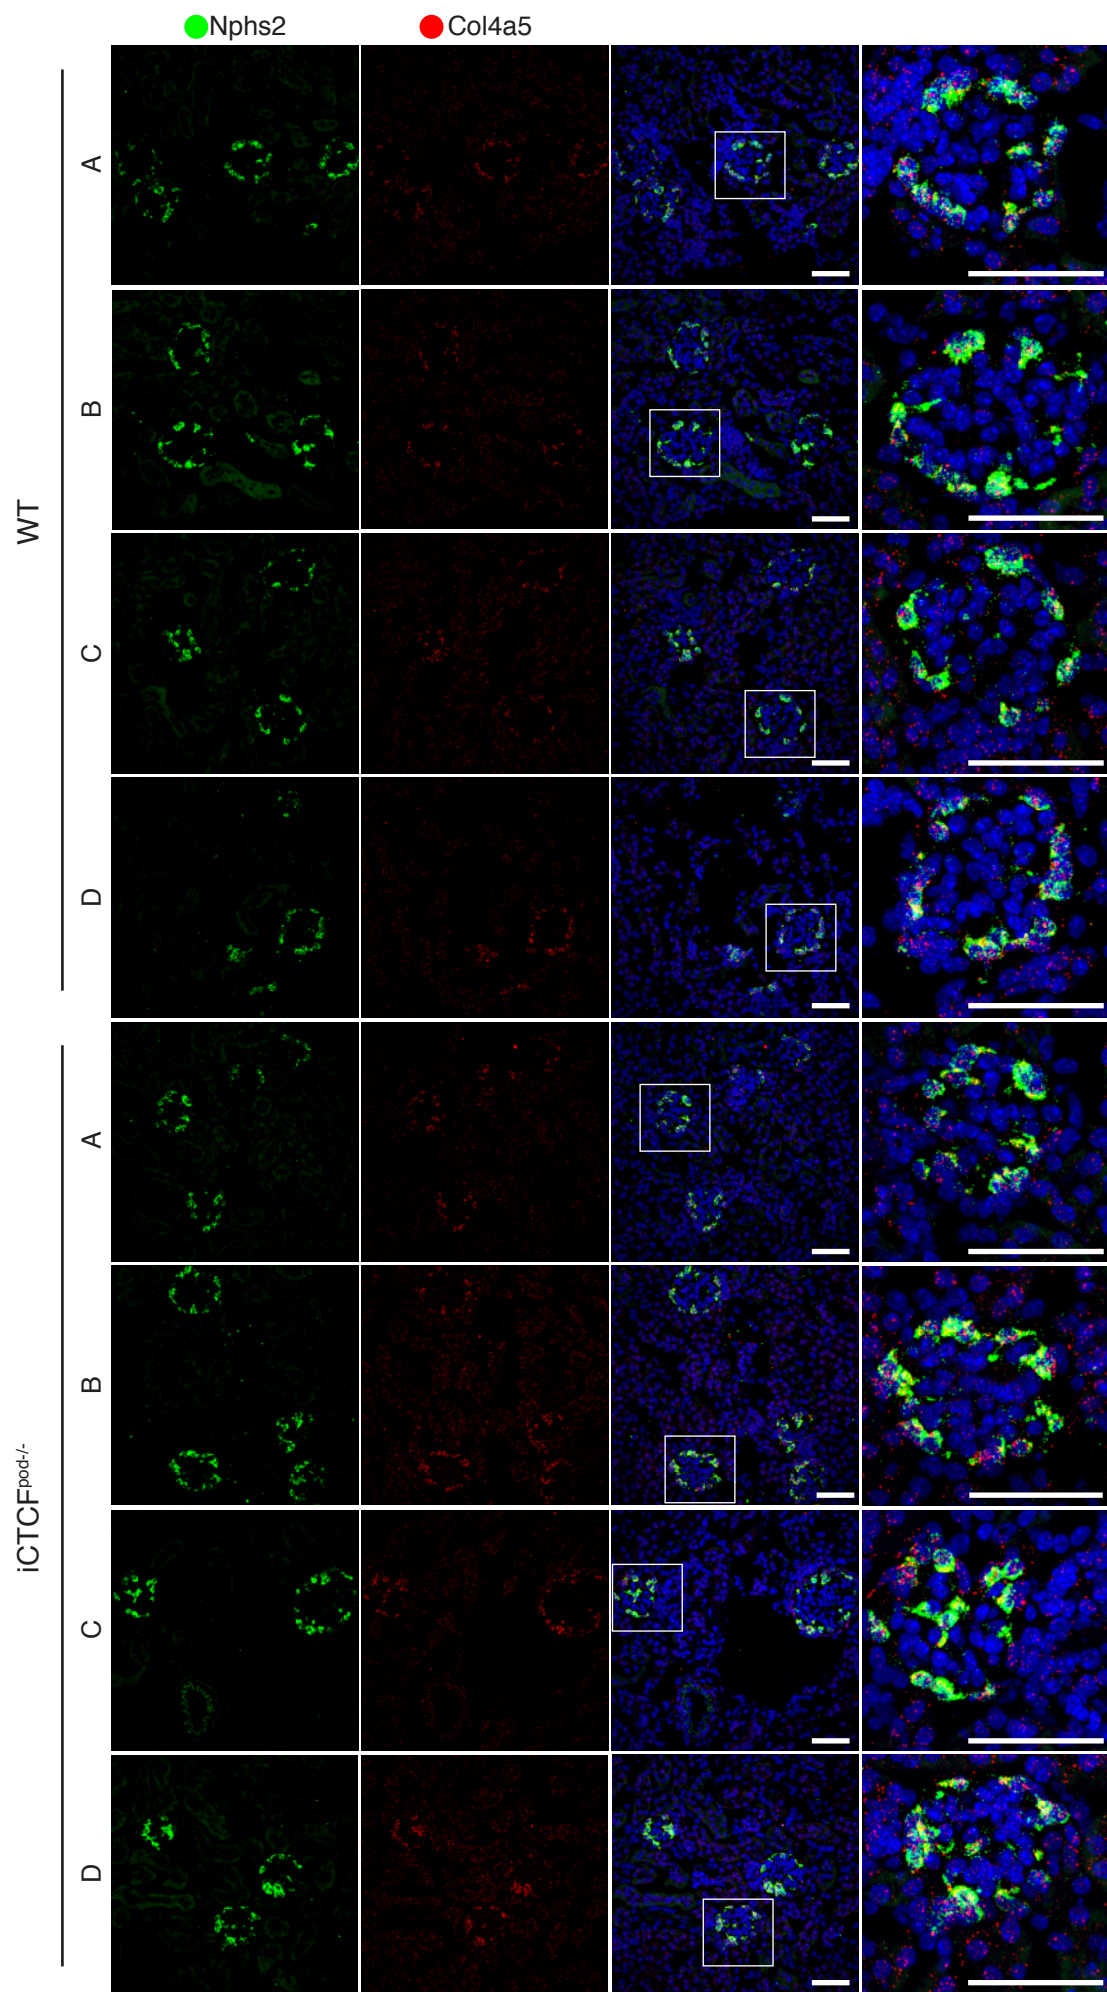

Supplement: mmc5.pdf [file mmc5.pdf]

A

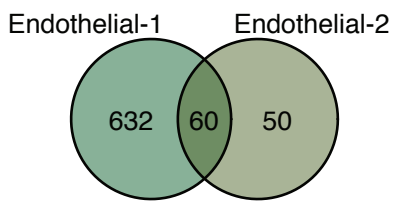

C

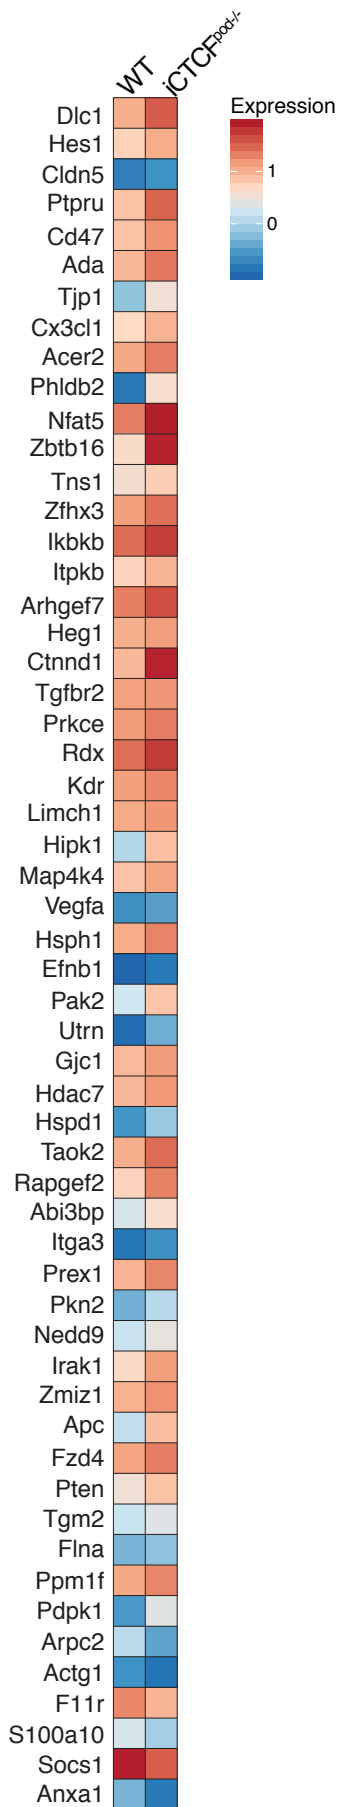

B

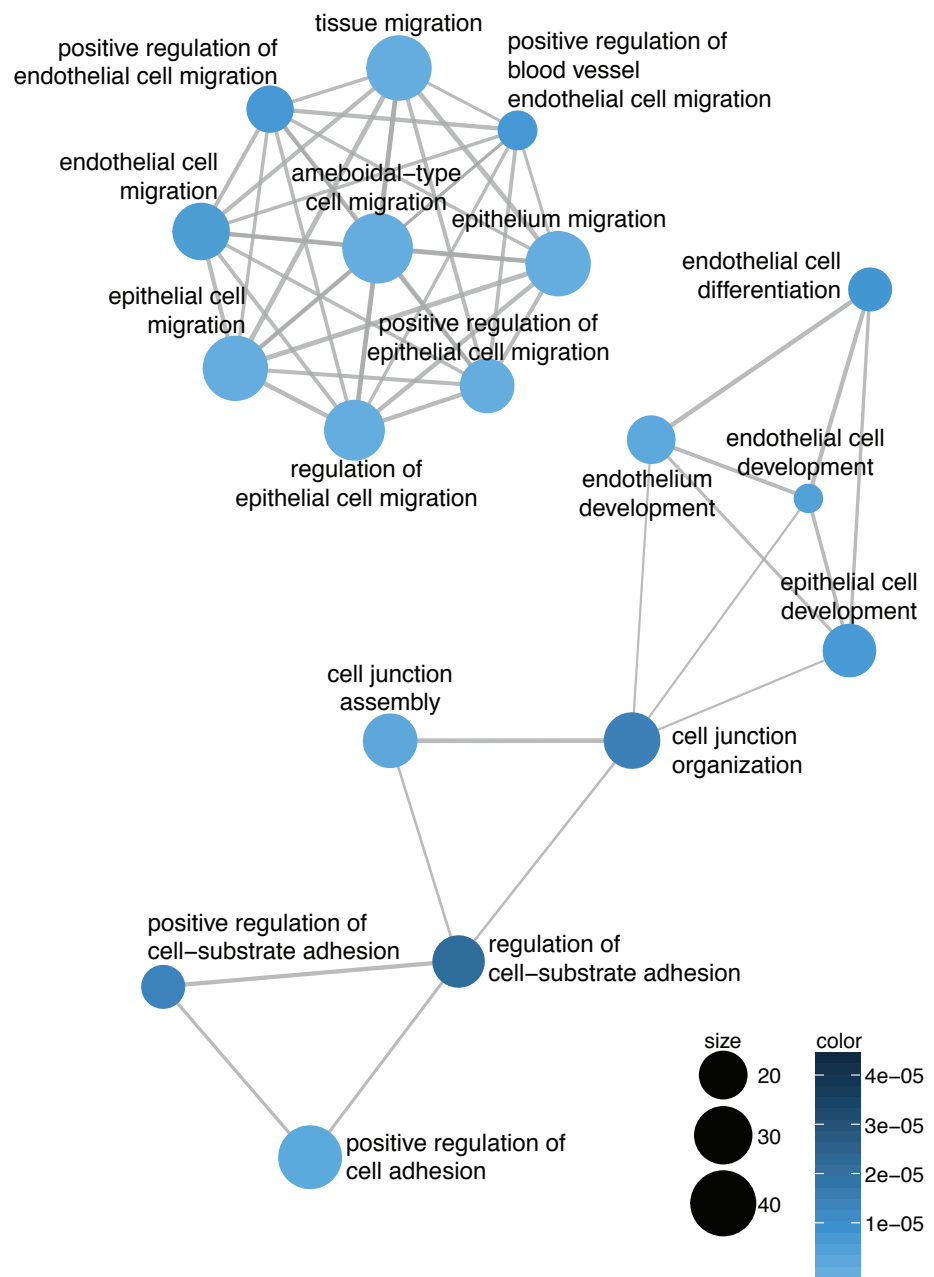

Supplement: mmc6.pdf [file mmc6.pdf]

iCTCF<sup>pod-/-</sup>  
GEC

DKD  
GEC

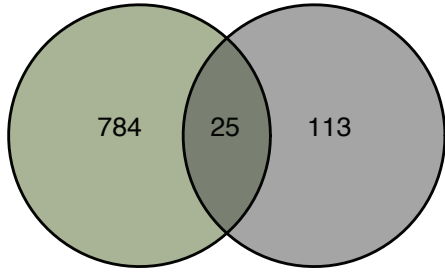

Supplement: mmc7.pdf [file mmc7.pdf]
